# Supplementary material
Source: PubMed Central journal article supplement (PMC3347433)
Supplement: supp_80.5.1858_IAI-IAI06075-11-s01.pdf [file supp_80.5.1858_IAI-IAI06075-11-s01.pdf]

Supplemental figures

Figure S1

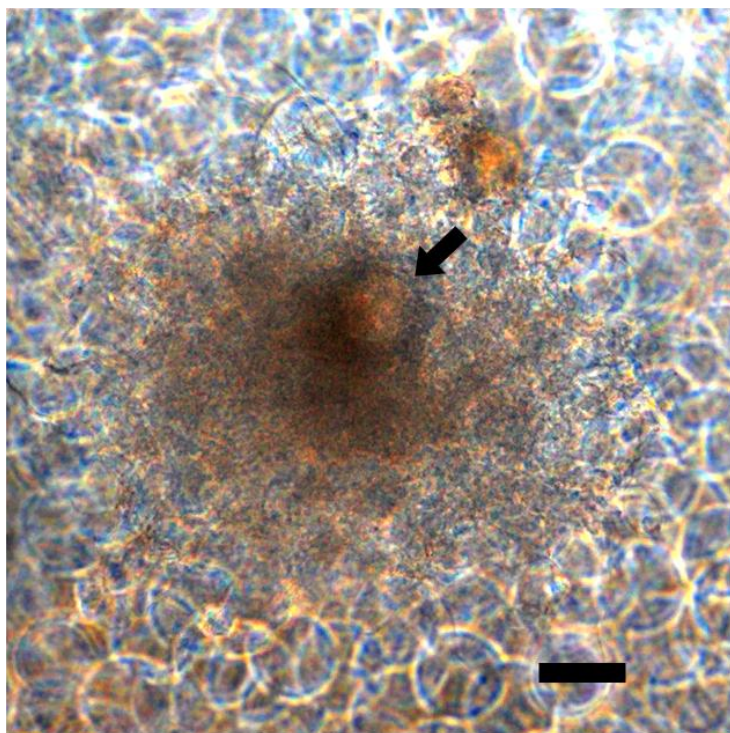

Figure S1. *In situ* microscopy of an exfoliated PD07i cell (arrow) inside a FC. The cell is loosely attached above the BEC-layer and swept in a mesh of filamentous UTI89. Size bar=50 $\mu$ m.

Figure S2

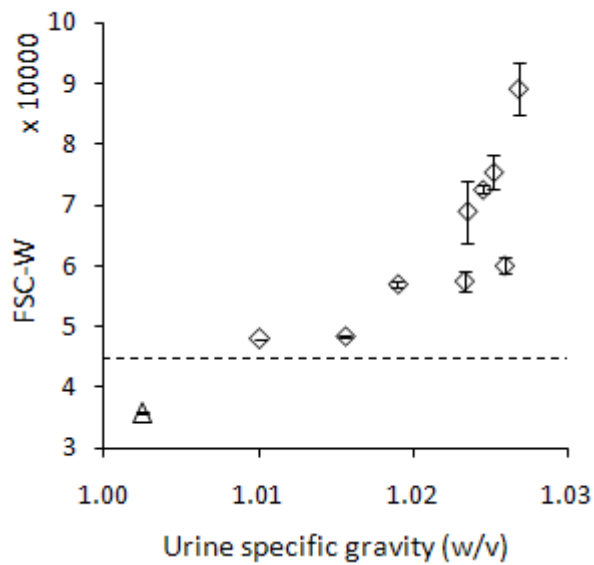

Figure S2. FSC-W values measured for bacteria harvested after secondary surface-colonization in urines of 10 different concentrations.  $10^5$  counts were collected for each sample and each point in the graph indicates mean value for two independent experiments with  $\pm 1$  SD. Dotted line indicates mean FSC-W value for agar-plated UTI89. Samples obtained using the most dilute urine differentiate from the other points in that these samples did not originate from visible surface colonization (see text) and hence are marked with a triangle.

Figure S3

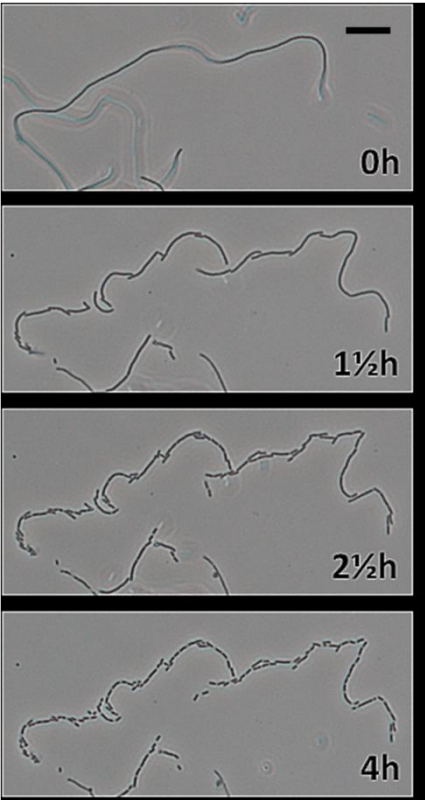

Figure S3. Reversal of a filament several hundred  $\mu\text{m}$  in length. Size bar= $20\mu\text{m}$ .

Figure S4

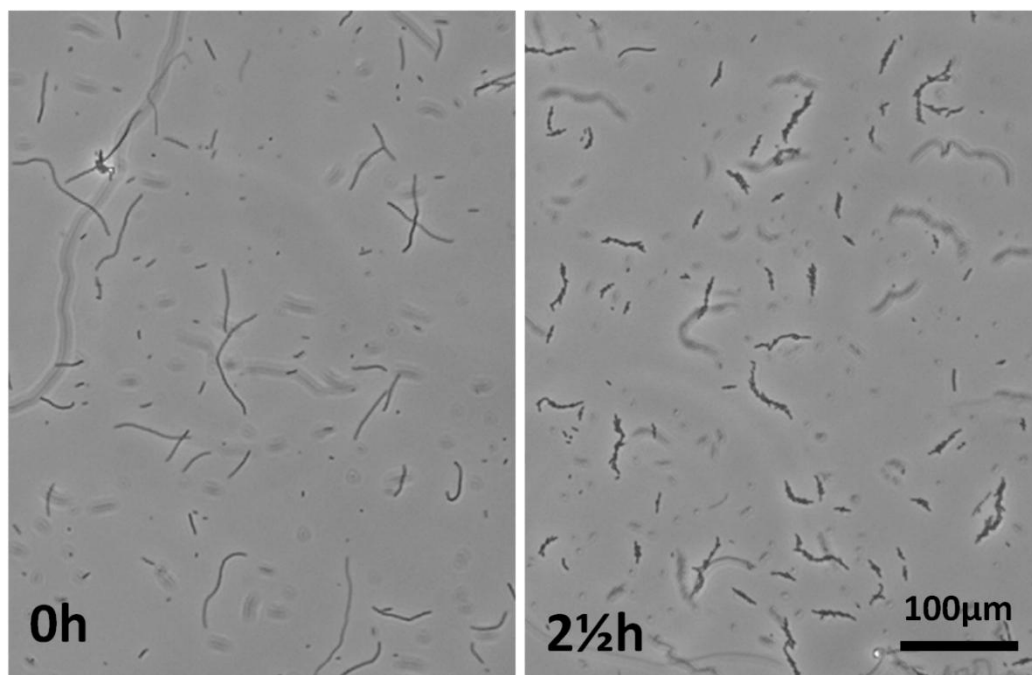

Figure S4. The majority of filaments revert to rods after harvest. Left picture shows a population of harvested filaments and right picture the same sample after 2½ hr at room temperature, with filaments/subfilaments septated into rods.
